# Supplementary material for: Molecular Characterisation of Flavanone O-methylation in Eucalyptus
Source: MDPI journal article supplement (doi:10.3390/ijms23063190), 2022-03-16
Supplement: s1 [file s1]

**Table S1.** List and details of primers used in the study.

| Function                             | Primer name    | Primer sequence                         | Notes                                   |
|--------------------------------------|----------------|-----------------------------------------|-----------------------------------------|
| Cloning of EnOMT sequences into pHUE | EnOMT1_F       | GCGGT <u>ACCAT</u> GGATCCTCTCGATGAGAC   | KpnI restriction sequence underlined    |
|                                      | EnOMT1_R       | TAGCGGCCGCTCACAGCGGGAAAGCTTCAA          | NotI restriction sequence underlined    |
|                                      | EnOMT2_F       | AGCCGT <u>ACCAT</u> GAGCGAGAGCGAGATCTTC | KpnI restriction sequence underlined    |
|                                      | EnOMT2_R       | ACCTGCGGCCGCTCAAGGATAACCTCAATG          | NotI restriction sequence underlined    |
|                                      | EnOMT3_F       | TTGAGA <u>AATTC</u> ATGGATCCTAGCGAGACCC | EcoRI restriction sequence underlined   |
|                                      | EnOMT3_R       | AGCGA <u>AAGCTT</u> CACTTCTTTTGTAAGTCTC | HindIII restriction sequence underlined |
| EnOMT1 mutagenesis                   | EnOMT1_R1_F    | TCATGAAGGGGATCCTGCACGATTGGAAT           | Nucleotide changes shown in red         |
|                                      | EnOMT1_R1_R    | ATTCCAATCGTGCAGGATCCCTTCATGA            | Nucleotide changes shown in red         |
|                                      | EnOMT1_R2_F    | GATGATCACGCTGAGCGGAGGTAAAGAG            | Nucleotide changes shown in red         |
|                                      | EnOMT1_R2_R    | CTCTTTACCTCGCTCAGCGTGATCATC             | Nucleotide changes shown in red         |
|                                      | EnOMT1_W252G_F | GTTTTCATGAAGGGGTCCTGCAC                 | Nucleotide change shown in red          |
|                                      | EnOMT1_W252G_R | GTGCAGGACCCCTTCATGAAAAC                 | Nucleotide change shown in red          |
|                                      | EnOMT1_V253I_F | TTTCATGAAGTGGATCCTGCACAATTGG            | Nucleotide change shown in red          |
|                                      | EnOMT1_V253I_R | CCAATTGTGCAGGATCCACTTCATGAAA            | Nucleotide change shown in red          |
|                                      | EnOMT1_N256D_F | GGTCCTGCACGATTGGAATGATG                 | Nucleotide change shown in red          |
|                                      | EnOMT1_N256D_R | CATCATTCGAATCGTGCAGGACC                 | Nucleotide change shown in red          |

|               |               |                          |                                                  |
|---------------|---------------|--------------------------|--------------------------------------------------|
| qPCR analysis | Eucons4_F     | TACAAGCGCTGTTGATATGTGGGC | qPCR reference gene                              |
|               | Eucons4_R     | TTGCCAATGAGGCGGATTCACAAG | qPCR reference gene                              |
|               | EnOMT1_qPCR_F | TACAAGCGCTGTTGATATGTGGC  | qPCR analysis of <i>EnOMT1</i> and <i>EmOMT1</i> |
|               | EnOMT1_qPCR_R | TTGCCAATGAGGCGGATTCACAAG | qPCR analysis of <i>EnOMT1</i> and <i>EmOMT1</i> |
