# Supplementary material for: Molecular Characterisation of Flavanone O-methylation in Eucalyptus
Source: MDPI journal article supplement (doi:10.3390/ijms23063190), 2022-03-16
Supplement: s1 [file s1]

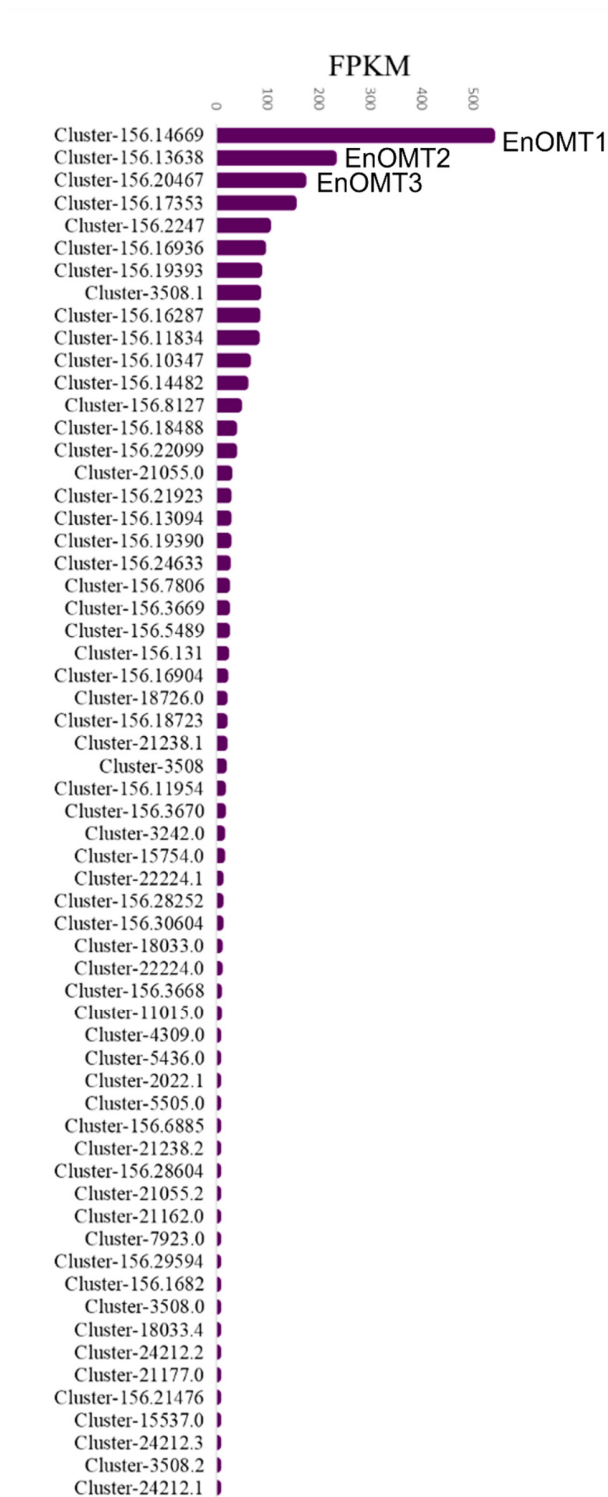

**Figure S1.** Unigene clusters annotated as methyltransferases in *E. nitida*. Clusters (X-axis) are presented with corresponding FPKM values (Y-axis).

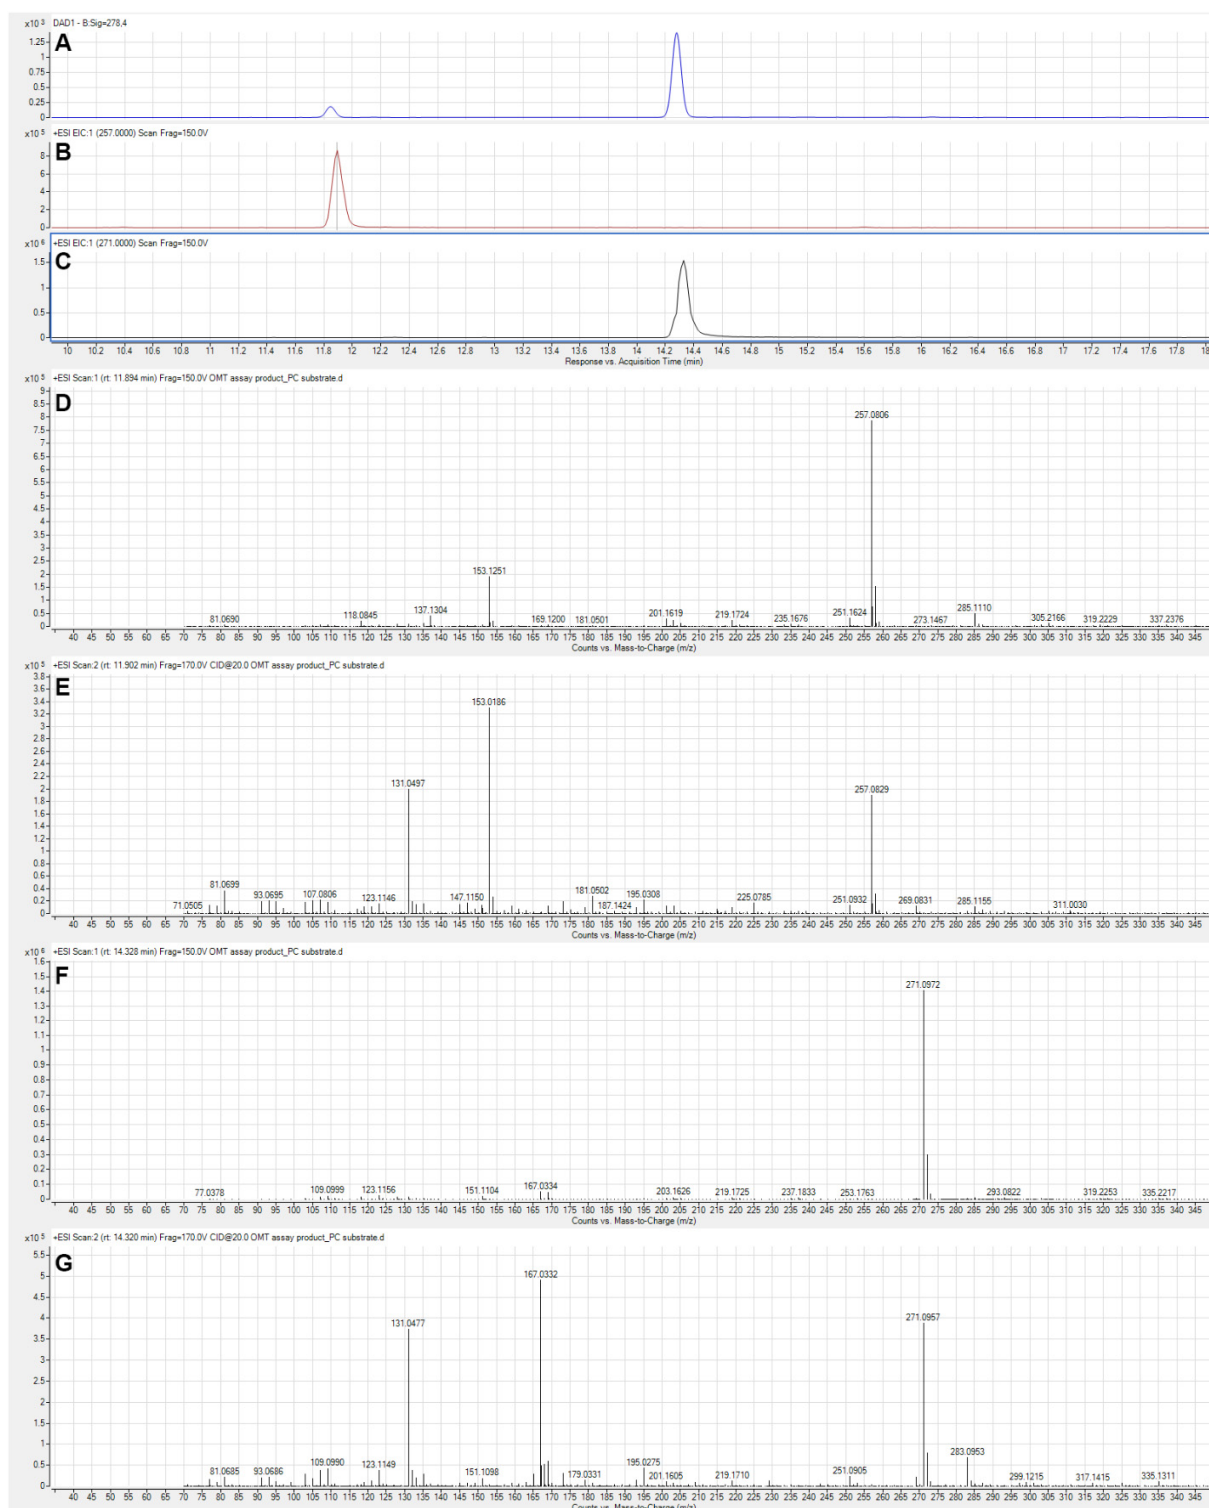

**Figure S2.** Representative ESI-LCMS data for EnOMT1 assay product with pinocembrin as substrate. (A) UV data; (B) Extracted Ion Current at  $m/z$  257  $[M + H]^+$  for pinocembrin substrate; (C) EIC at  $m/z$  271  $[M + H]^+$  for mono-methylated assay product; (D) MS1 data for pinocembrin substrate; (E) MS2 data for pinocembrin substrate showing key fragment ions (F) MS1 data for

monomethylated product; (G) MS2 data for monomethylated product showing key fragment ions.

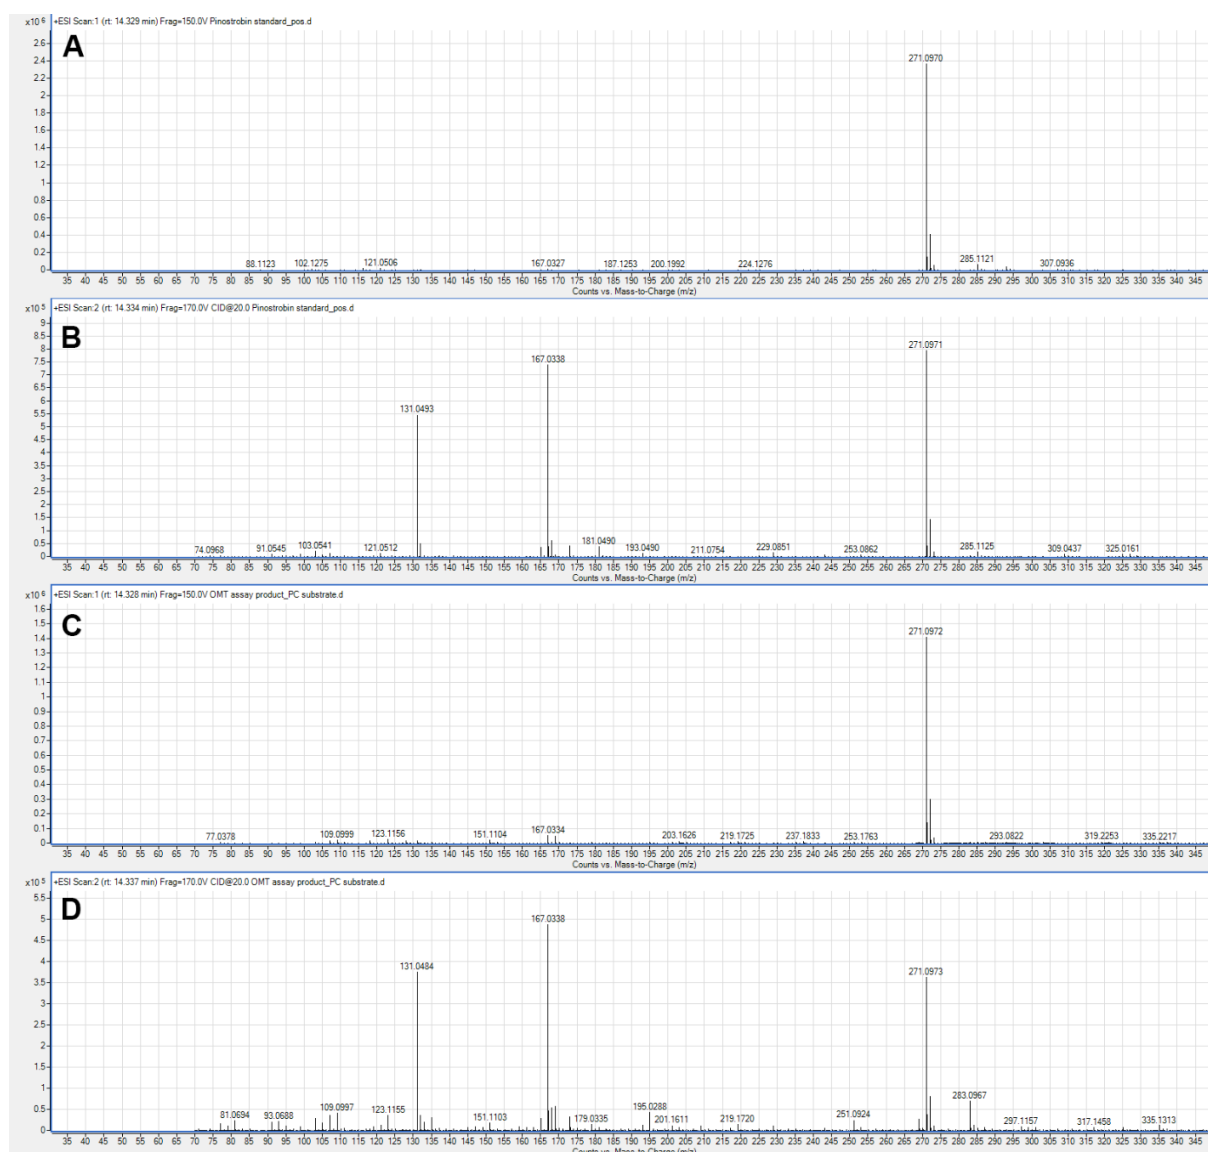

**Figure S3.** Representative ESI-LCMS data for EnOMT1 assay product with pinocembrin as substrate compared to a pinostrobin standard. (A) Extracted Ion Current at  $m/z$  271  $[M + H]^+$  for the pinostrobin standard; (B) MS2 data for pinostrobin standard showing key fragment ions (C) EIC at  $m/z$  271  $[M + H]^+$  for mono-methylated assay product; (D) MS2 data for monomethylated product showing key fragment ions matching those of the pinostrobin standard.

|        |     |     |     |     |     |    |
|--------|-----|-----|-----|-----|-----|----|
| EcOMT1 | 1   | 10  | 20  | 30  | 40  | 50 |
| EnOMT1 | 1   | 10  | 20  | 30  | 40  | 50 |
| EcOMT1 | 60  | 70  | 80  | 90  | 100 |    |
| EnOMT1 | 60  | 70  | 80  | 90  | 100 |    |
| EcOMT1 | 110 | 120 | 130 | 140 | 150 |    |
| EnOMT1 | 110 | 120 | 130 | 140 | 150 |    |
| EcOMT1 | 160 | 170 | 180 | 190 | 200 |    |
| EnOMT1 | 160 | 170 | 180 | 190 | 200 |    |
| EcOMT1 | 210 | 220 | 230 | 240 | 250 |    |
| EnOMT1 | 210 | 220 | 230 | 240 | 250 |    |
| EcOMT1 | 260 | 270 | 280 | 290 | 300 |    |
| EnOMT1 | 260 | 270 | 280 | 290 | 300 |    |
| EcOMT1 | 310 | 320 | 330 | 340 | 351 |    |
| EnOMT1 | 310 | 320 | 330 | 340 | 351 |    |

**Figure S4.** Amino acid alignment of OMT1 sequences from the pinostrobin-rich species *E. croajingolensis* (EcOMT1) and *E. nitida* (EnOMT1).

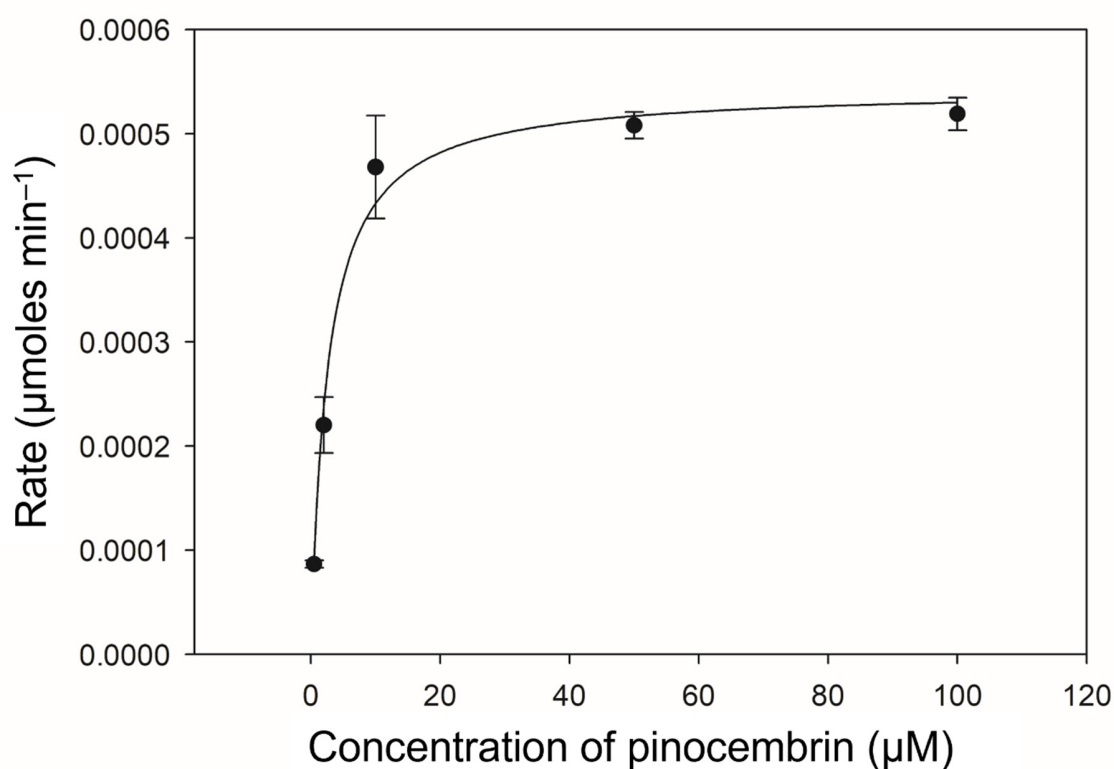

**Figure S5.** Michaelis-Menten curve of EcOMT1 with pinocembrin as substrate. Data points represent the initial velocities observed at different concentrations of pinocembrin at saturating SAM concentrations.

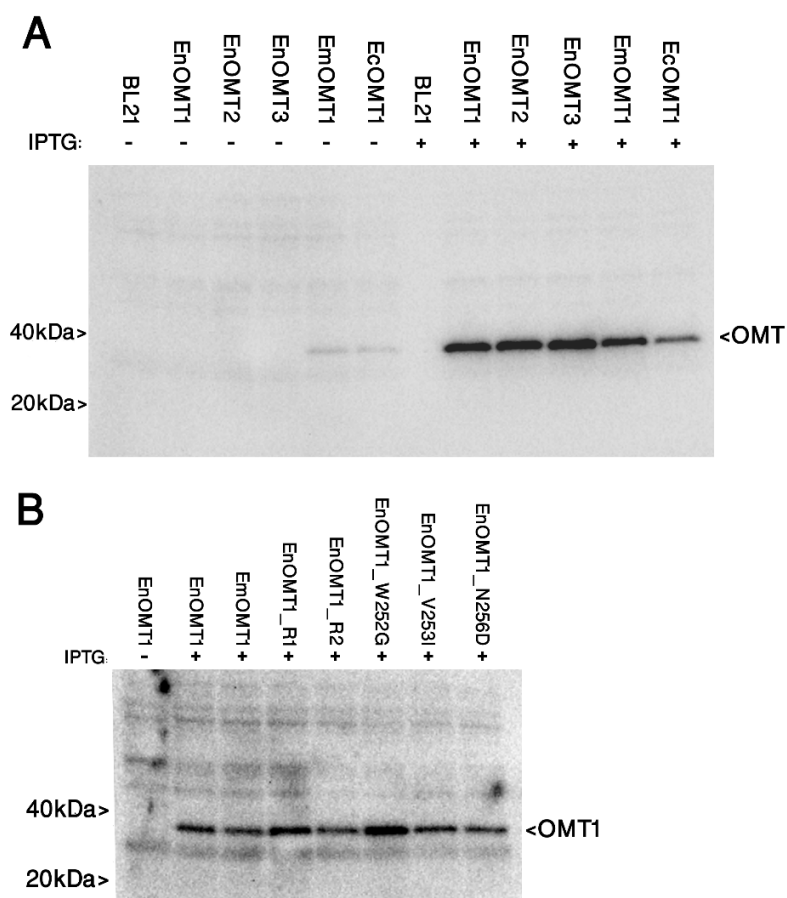

**Figure S6.** Western blot analysis of crude bacterial extracts containing recombinantly expressed OMTs. (A) Uninduced (IPTG -) and induced (IPTG +) samples of putative OMTs isolated from *E. nitida* (EnOMT1 -EnOMT3), *E. mitchelliana* (EmOMT1) and *E. croajingolensis* (EcOMT1), plus untransformed BL21 cells. (B) Uninduced (IPTG -) EnOMT1 and induced (IPTG +) EnOMT1, EmOMT1 and various EnOMT1 mutants. Bands marked as OMT(1) represent His-tagged O-methyltransferases (expected size 37-38kDa) detected by anti-His antibody.
